# Supplementary material
Source: PubMed Central journal article supplement (PMC3107574)
Supplement: NIHMS288377-supplement-1_si_001.pdf [file NIHMS288377-supplement-1_si_001.pdf]

**SUPPORTING INFORMATION**  
**of**  
**Density Functional Theory Study of an All Ferrous 4Fe-4S Cluster**

by Mrinmoy Chakrabarti, Eckard Münck, and Emile L. Bominaar

**Decomposition of BS  $M_S = 4$  state (II in Figure 2) in terms of proper cluster spin states:**

$$|M_{1-3} = 6, M_4 = -2, M_S = 4\rangle = \sum_{S=4}^8 C_S | \{S_{1-3} = 6, S_4 = 2\} S, M_S = 4 \rangle$$

The moduli and squares of the expansion coefficients are given in following table:

**Expansion of BS  $M_S = 4$  in pure spin states**

| $S$ | $ C_S $ | $C_S^2$ |
|-----|---------|---------|
| 4   | 0.832   | 0.692   |
| 5   | 0.492   | 0.242   |
| 6   | 0.239   | 0.057   |
| 7   | 0.091   | 0.008   |
| 8   | 0.023   | 0.001   |

### Optimized geometry in the BS $M_S = 4$ state (II in Figure 2)

|    |           |           |           |
|----|-----------|-----------|-----------|
| Fe | 0.590685  | 0.169731  | 1.131776  |
| Fe | 1.810722  | -1.108396 | 2.931825  |
| Fe | 0.555542  | -2.379398 | 1.097003  |
| Fe | -0.814166 | -1.093936 | 2.955277  |
| S  | 0.470718  | 0.724019  | 3.369041  |
| S  | 0.419954  | -2.896559 | 3.374047  |
| S  | -1.334126 | -1.042429 | 0.782289  |
| S  | 2.607280  | -1.147844 | 0.605893  |
| C  | -2.404857 | -1.182354 | 4.038934  |
| C  | 3.694965  | -1.216625 | 3.723450  |
| C  | 0.962706  | -3.896456 | -0.240343 |
| C  | 1.022349  | 1.624783  | -0.237848 |
| C  | -4.526351 | -0.879892 | 4.881085  |
| C  | -3.880943 | -1.740845 | 5.715084  |
| C  | 5.609684  | -1.318673 | 4.976484  |
| C  | 5.976375  | -1.311555 | 3.660936  |
| C  | 2.213138  | -4.966126 | -1.824710 |
| C  | 1.092813  | -5.720172 | -1.620139 |
| C  | 1.157259  | 3.435120  | -1.634413 |
| C  | 2.244131  | 2.644051  | -1.876200 |
| N  | -2.603418 | -1.905225 | 5.191078  |
| N  | -3.615786 | -0.552076 | 3.880964  |
| N  | 4.800546  | -1.248710 | 2.935087  |
| N  | 4.221522  | -1.259925 | 4.983457  |
| N  | 2.101842  | -3.877529 | -0.979266 |
| N  | 0.354287  | -5.047147 | -0.654523 |
| N  | 0.434786  | 2.792107  | -0.636817 |
| N  | 2.132379  | 1.564839  | -1.018321 |
| H  | -5.532112 | -0.481005 | 4.919362  |
| H  | -4.218709 | -2.233563 | 6.617978  |
| H  | 6.206568  | -1.358046 | 5.879440  |
| H  | 6.958266  | -1.344906 | 3.205457  |
| H  | 3.053001  | -5.122189 | -2.490288 |
| H  | 0.773355  | -6.651913 | -2.070642 |
| H  | 0.851297  | 4.374741  | -2.077642 |
| H  | 3.062905  | 2.770107  | -2.573582 |
| H  | -1.881906 | -2.522050 | 5.547538  |
| H  | -3.801223 | 0.042588  | 3.082890  |
| H  | 4.651103  | -1.230159 | 1.913811  |
| H  | 3.640860  | -1.250159 | 5.813227  |
| H  | 2.740970  | -3.078438 | -0.836111 |
| H  | -0.537718 | -5.351503 | -0.283632 |
| H  | -0.432386 | 3.126469  | -0.233885 |
| H  | 2.752606  | 0.749105  | -0.891398 |

**Bond distances in the optimized BS  $M_S = 4$  geometry. (Fe<sub>4</sub> is special iron)**

|                                 | Distance (Å) |
|---------------------------------|--------------|
| Fe <sub>4</sub> -S <sub>1</sub> | 2.224        |
| Fe <sub>4</sub> -S <sub>2</sub> | 2.235        |
| Fe <sub>4</sub> -S <sub>3</sub> | 2.264        |
| Fe <sub>1</sub> -S <sub>2</sub> | 2.301        |
| Fe <sub>1</sub> -S <sub>3</sub> | 2.308        |
| Fe <sub>1</sub> -S <sub>4</sub> | 2.466        |
| Fe <sub>2</sub> -S <sub>1</sub> | 2.308        |
| Fe <sub>2</sub> -S <sub>3</sub> | 2.312        |
| Fe <sub>2</sub> -S <sub>4</sub> | 2.459        |
| Fe <sub>3</sub> -S <sub>1</sub> | 2.339        |
| Fe <sub>3</sub> -S <sub>2</sub> | 2.336        |
| Fe <sub>3</sub> -S <sub>4</sub> | 2.443        |
| Fe <sub>1</sub> -C <sub>1</sub> | 2.044        |
| Fe <sub>2</sub> -C <sub>2</sub> | 2.047        |
| Fe <sub>3</sub> -C <sub>3</sub> | 2.063        |
| Fe <sub>4</sub> -C <sub>4</sub> | 1.927        |

**Bond angles in the optimized BS  $M_S = 4$  geometry. (Fe<sub>4</sub> is special iron)**

|                                                  | Angle (°) |
|--------------------------------------------------|-----------|
| Fe <sub>4</sub> -S <sub>2</sub> -Fe <sub>1</sub> | 70.7      |
| Fe <sub>4</sub> -S <sub>3</sub> -Fe <sub>1</sub> | 70.1      |
| Fe <sub>4</sub> -S <sub>1</sub> -Fe <sub>2</sub> | 70.8      |
| Fe <sub>4</sub> -S <sub>3</sub> -Fe <sub>2</sub> | 70.0      |
| Fe <sub>4</sub> -S <sub>1</sub> -Fe <sub>3</sub> | 70.7      |
| Fe <sub>4</sub> -S <sub>2</sub> -Fe <sub>3</sub> | 70.6      |
| Fe <sub>1</sub> -S <sub>3</sub> -Fe <sub>2</sub> | 66.2      |
| Fe <sub>1</sub> -S <sub>4</sub> -Fe <sub>2</sub> | 61.6      |
| Fe <sub>1</sub> -S <sub>2</sub> -Fe <sub>3</sub> | 66.7      |
| Fe <sub>1</sub> -S <sub>4</sub> -Fe <sub>3</sub> | 62.6      |
| Fe <sub>2</sub> -S <sub>1</sub> -Fe <sub>3</sub> | 66.9      |
| Fe <sub>2</sub> -S <sub>4</sub> -Fe <sub>3</sub> | 63.0      |
